# Supplementary material
Source: PubMed Central journal article supplement (PMC4335860)
Supplement: AAC.04617-14_zac002153693so1.pdf [file AAC.04617-14_zac002153693so1.pdf]

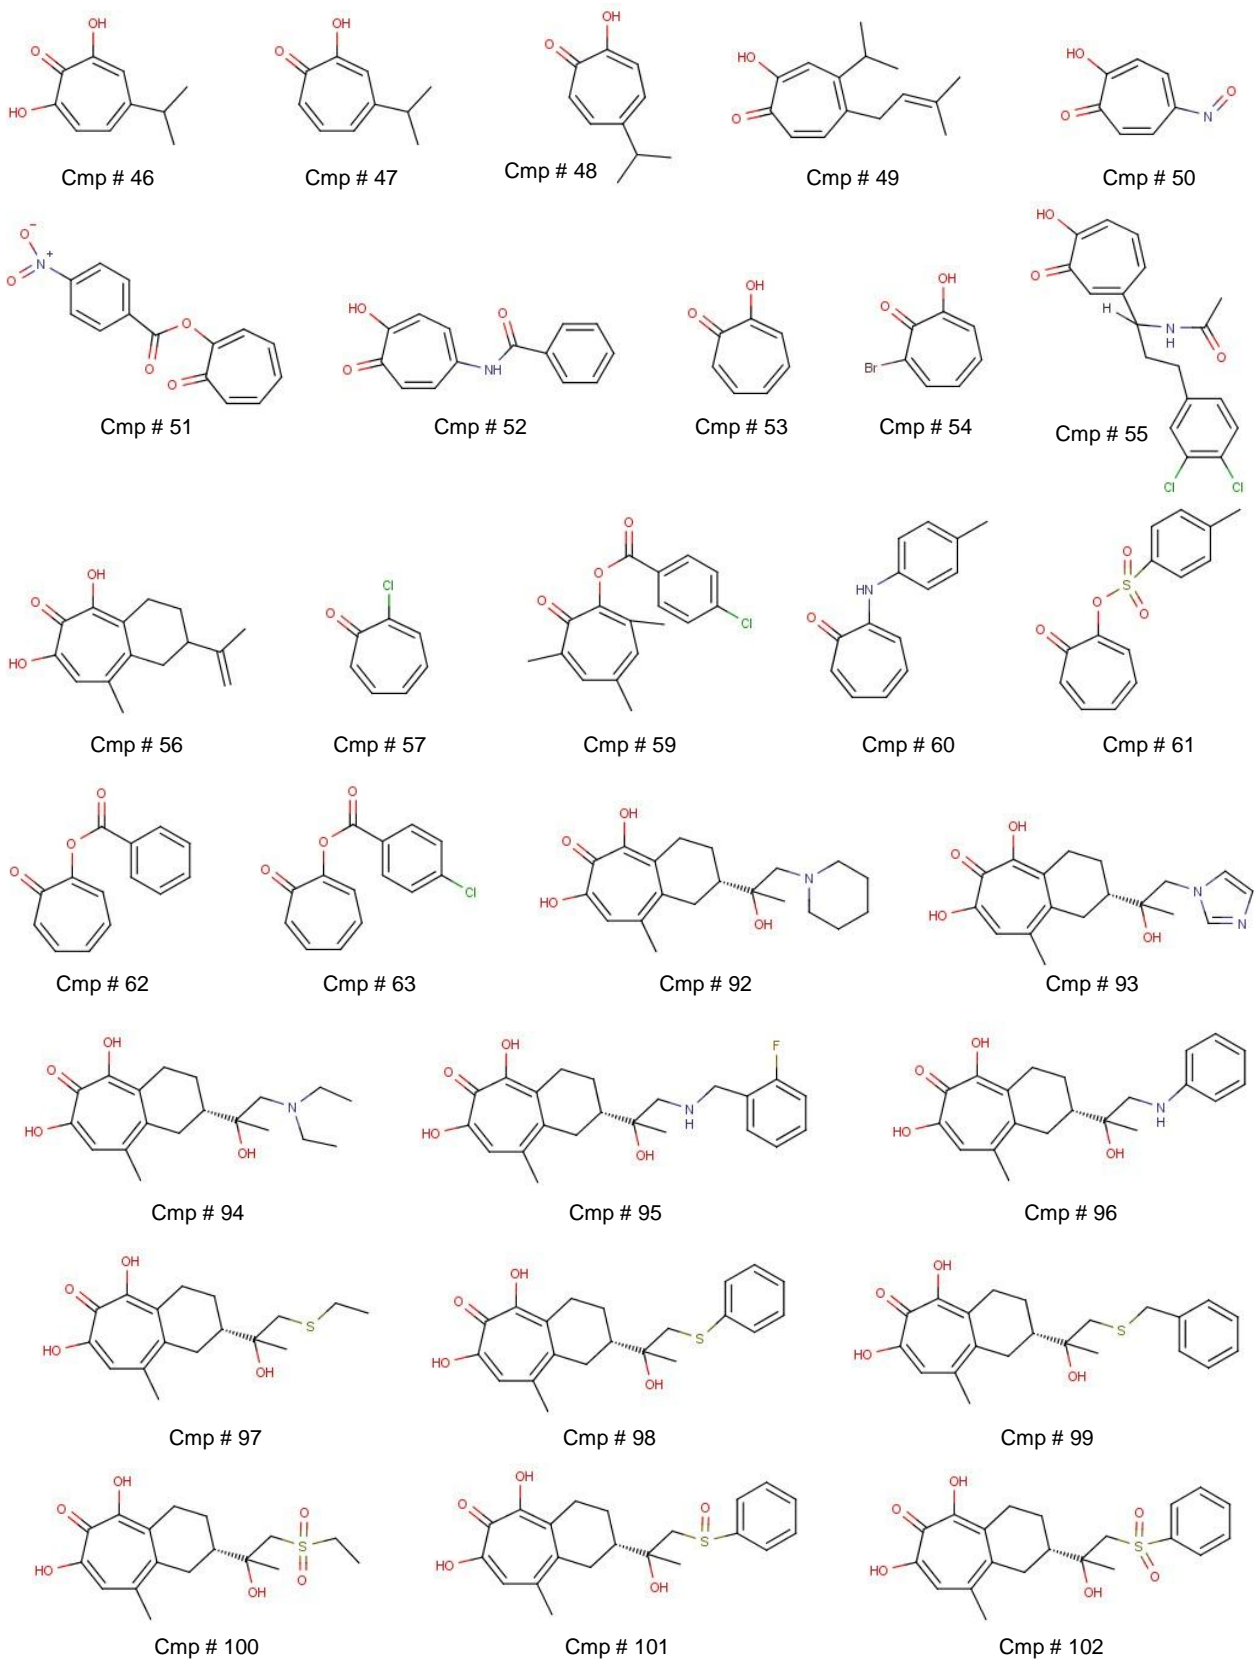

Figure 1S. Tropolones and related compounds employed in this study

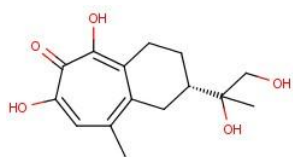

Cmp # 103

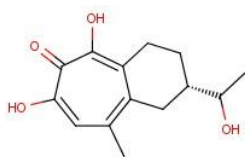

Cmp # 104

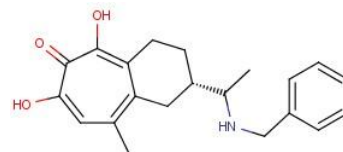

Cmp # 105

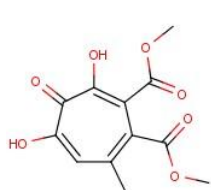

Cmp # 106

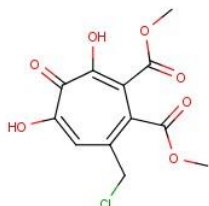

Cmp # 107

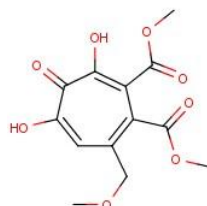

Cmp # 108

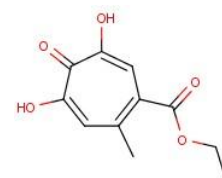

Cmp # 109

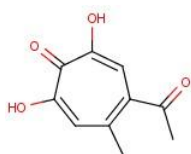

Cmp # 110

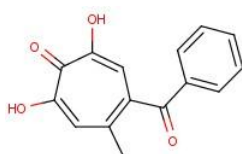

Cmp # 111

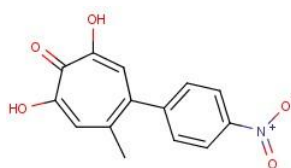

Cmp # 112

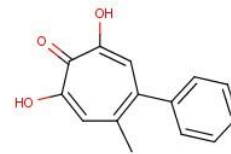

Cmp # 113

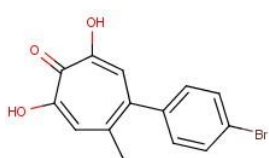

Cmp # 114

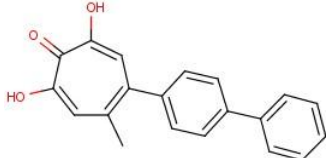

Cmp # 115

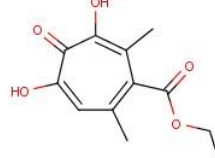

Cmp # 117

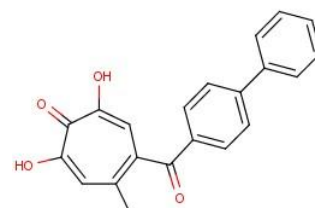

Cmp # 118

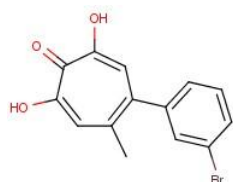

Cmp # 119

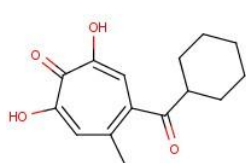

Cmp # 120

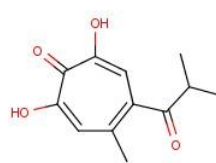

Cmp # 143

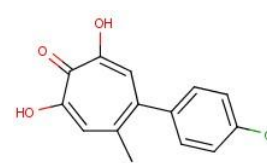

Cmp # 144

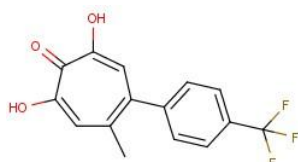

Cmp # 145

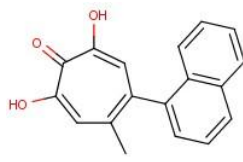

Cmp # 146

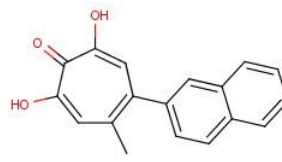

Cmp # 147

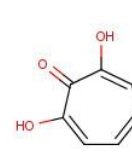

Cmp # 172

Figure 1S. Troponones and related compounds employed in this study
